# Supplementary material
Source: publisher site journal article supplement (https://www.dovepress.com/get_supplementary_file.php?f=469051.docx)
Supplement: Supplementary file 1 [file get_supplementary_file.php]

**Figure S1. Survey Questions

1. Have you ever been diagnosed with age-related macular degeneration (AMD)?** You might also know this as “macula”, “macular”, or “fluid in the back of your eye.

- Yes
- No

**2. What type of AMD do you have?**

- Wet AMD in one eye
- Wet AMD in both eyes
- Dry AMD in one eye
- Dry AMD in both eyes
- Wet AMD in one eye and dry AMD in the other eye
- I don’t know

**3. Where do you live?**

- Alberta
- British Columbia
- Manitoba
- New Brunswick
- Newfoundland
- Nova Scotia
- Ontario
- Prince Edward Island
- Quebec
- Saskatchewan
- Northwest Territories
- Nunavut
- Yukon
- Outside of Canada

**4. What is your postal code?** Please enter the 6-digit code with no spaces.

**5. Who do you live with?** Select all that apply.

- No one
- Partner (spouse, boyfriend or girlfriend)
- My child(ren)
- Family member other than spouse and child
- Roommate/Friend
- I live in a retirement home
- I live in a nursing home/long-term care facility
- Other (please specify):

**6. We will be conducting telephone interviews with individuals who would like to tell us more about their experiences with AMD. Can we contact you to participate in an interview? Even if you select “Yes”, you may change your mind and decline to be interviewed.**

- No
- Yes; please provide your telephone number and email address

**SECTION I: EDUCATIONAL NEEDS**

**7. What information do you think is important to receive when diagnosed with AMD?** Select all that apply.

- What to expect with this eye condition
- Importance of going to doctor’s appointments
- How to access social services to help me get to my appointments
- Information about vitamins
- Patients should receive more information at later appointments, so they have time to think about what they’d like to know
- Other (please specify):

**8. Other than from your ophthalmologist, how would you prefer to receive information about AMD?** Select all that apply.

- Online
- Pamphlets
- Informational video in my ophthalmologist’s waiting room
- Telephone hotline
- Nurse calling to check on me
- Other (please specify):

**9. From what sources do you currently seek information about AMD?** Select all that apply.

- My ophthalmologist
- My optometrist
- My family physician
- Family/friends
- Fighting Blindness Canada website
- CNIB website
- Other source (please specify):

**10. Which of the following topics is of interest to you?** Select all that apply.

- How to prevent my eye(s) from getting worse
- How to predict if my disease will worsen
- How my treatment is working, from photos of my eye that my doctor explain to me
- How to access social services to get to my appointments
- New research about AMD
- Genetic testing and how it may show which people with AMD can be helped by certain vitamins
- I don’t want more information
- Other (please specify):

**SECTION II: TREATMENTS**

**11. If a new treatment became available for AMD, would you be interested in learning more about it?**

- Yes
- No
- I don’t know

**12. Approximately when was your first injection for AMD?**

- Less than 3 months ago
- 3-11 months ago
- 1-5 years ago
- 3-5 years ago
- More than 5 years ago
- I’ve never received injections for AMD

**13. Are you currently receiving injections for AMD?**

- Yes
- No; please explain why

**14. How have the injections helped your AMD?**

- They dried up fluid/blood in my eye(s)
- They helped me avoid losing more eyesight
- They improved my eyesight
- They have had no effect, but I receive injections because my doctor recommends them
- I don’t know
- Other (please specify):

**15. What is the name of the injection drug you are receiving?** If you receive more than one, select the one you most recently received.

- Eyelea
- Lucentis
- Avastin
- Ozurdex
- I don’t know
- Other (please specify):

**16. What is your level of satisfaction with the injections, based on how they have helped your AMD?**

- Very satisfied
- Satisfied
- Neither satisfied nor dissatisfied
- Dissatisfied
- Very dissatisfied

**17. In the last year, approximately how many injections were you scheduled to receive?**

- 0
- 1-3
- 4-6
- Over 6

**18. In the last year, did you delay or cancel any of your injections?**

- Yes
- No

**19. For what reason(s) have you delayed or cancelled your injections for AMD?** Select all that apply.

- Too busy to attend appointment
- Unable to travel to appointment
- Could not afford attending the appointment
- Unable to find someone to take me to the appointment
- Scared to receive the injection
- Did not find previous injections helpful
- Did not know how important the injection was to my sight
- I forgot about the appointment
- I was not feeling well
- Other (please specify):

**20. Approximately how long does it take for you to travel to your injection appointment (one-way)?**

- Less than 30 minutes
- 31-60 minutes
- More than 1 hour but less than 2 hours
- More than 2 hours but less than 4 hours
- More than 4 hours

**21. On average, how long do your injection appointments take?** This is total time spent at doctor’s office, including waiting time.

- One hour or less
- More than 1 hour but less than 2 hours
- More than 2 hours but less than 4 hours
- More than 4 hours but less than 6 hours
- More than 6 hours

**22. Who helps you when you go for your injections for AMD?** Select all that apply.

- No one
- Spouse
- Family member other than spouse
- Friend
- Neighbour
- Someone from social services
- Other (please specify):

**23. What sort of help do they give you?** Select all that apply.

- Travel with me or drive me to/from the appointment
- Wait with me at the appointment
- Take care of things at home while I am away
- Help me after the injections with everyday tasks
- Physical support at my appointment
- Other (please specify):

**24. Which of the following parts of attending your injection appointments are difficult for you?** Select all that apply.

- I don’t find any part difficult
- Cost of travel to/from the appointment
- Finding someone to drive me to/from the appointment
- Taking time off work to attend
- Long waiting time at the appointment
- Anxiety or fear about the injection
- Finding someone to help me with my daily tasks after the injection
- Scratchiness or pain in my eye after the appointment
- Other (please specify):

**25. What is it like to travel to your injection appointments?**

- Very easy
- Easy
- Neither easy nor difficult
- Difficult
- Very difficult

**26. What makes it difficult for you to travel to your injection appointments.** Select all that apply.

- It is far from home
- Poor road conditions
- My vehicle is in poor condition
- It is expensive to travel
- Other (please specify):

**27. How painful is the injection for you?**

- Not painful at all
- Slightly painful
- Painful
- Extremely painful

**28. How painful is it for you the evening after the injection?**

- Not painful at all
- Slightly painful
- Painful
- Extremely painful

**29. After an injection, for how long is your vision blurry?**

- Less than 1 hour
- 1-3 hours
- 4-6 hours
- Until I go to sleep that night
- For at least 24 hours

**30. On a typical day that you are not receiving an injection, which activities do you usually do?** Select all that apply.

- Drive
- Prepare meals
- Read
- Watch TV
- Provide care to family members
- Work
- None of the above activities

**31. Which of the following are you unable to do after an injection?**

- Drive
- Prepare meals
- Read
- Watch TV
- Provide care to family members
- Work
- None of the above activities

**32. What is your level of satisfaction with your eye appointments, based on how they have helped your AMD?**

- Very satisfied
- Satisfied
- Neither satisfied nor dissatisfied
- Dissatisfied
- Very dissatisfied

**33. In the last year, approximately how many eye appointments were you scheduled to have for your AMD?**

- 0
- 1-3
- 4-6
- Over 6

**34. In the last year, did you delay or cancel any of these appointments?**

- Yes
- No

**35. For what reason(s) have you delayed or cancelled your appointments for AMD.** Select all that apply.

- Too busy to attend appointment
- Unable to travel to appointment
- Could not afford attending the appointment
- Unable to find someone to take me to the appointment
- I forgot about the appointment
- I was not feeling well
- Other (please specify):

**36. Approximately how long does it take for you to travel to you eye appointment (one-way)?**

- Less than 30 minutes
- 31-60 minutes
- More than 1 hour but less than 2 hours
- More than 2 hours but less than 4 hours
- More than 4 hours

**37. On average, how long do your eye appointment for your AMD take?** This is total time spend at doctor’s office, including waiting time.

- One hour or less
- More than 1 hour but less than 2 hours
- More than 2 hours but less than 4 hours
- More than 4 hours and less than 6 hours
- More than 6 hours

**38. Who helps you when you go for these eye appointments?** Select all that apply.

- No one
- Spouse
- Family member other than spouse
- Friend
- Someone from social services
- Other (please specify):

**39. What sort of help do they give you?** Select all that apply.

- Travel with me or drive me to/from the appointment
- Wait with me at the appointment
- Take care of things at home while I am away
- Help me after with everyday tasks
- Physical support at my appointment
- Other (please specify):

**40. Which of the following parts of attending your eye appointments are difficult for you?** Select all that apply.

- I don’t find any part difficult
- Cost of travel to/from the appointment
- Finding someone to drive me to/from the appointment
- Taking time off work to attend
- Long waiting time at the appointment
- Other (please specify):

**41. What is it like to travel to your eye appointments?**

- Very easy
- Easy
- Neither easy nor difficult
- Difficult
- Very difficult

**42. What makes it difficult for you to travel to your injection appointments.** Select all that apply.

- It is far from home
- Poor road conditions
- My vehicle is in poor condition
- It is expensive to travel
- Other (please specify):

**SECTION III: IMPACT OF AMD ON DAILY LIFE**

Please read each question carefully and circle the answer that BEST applies to you. Put one circle on each row. If you use GLASSES, CONTACT LENSES OR MAGNIFIERS for some activities please answer according to how you can see when using them.

**43. In the PAST MONTH, how much has YOUR EYESIGHT INTERFERED with the following activities:**

|  | **Not at all** | **A little** | **A fair amount** | **A lot** | **Don’t do this activity for other reasons** |
| --- | --- | --- | --- | --- | --- |
| **Driving** |  |  |  |  |  |
| **Recognizing or meeting people** |  |  |  |  |  |
| **Looking after your appearance** |  |  |  |  |  |
| **Reading a book or newspaper** |  |  |  |  |  |
| **Using phone or iPad?** |  |  |  |  |  |

**44. In the PAST MONTH, how often has YOUR EYESIGHT MADE YOU CONCERNED about the following:**

|  | **Not at all** | **Very rarely** | **A little of the time** | **A fair amount of the time** | **A lot of the time** | **All the time** |
| --- | --- | --- | --- | --- | --- | --- |
| **Your general safety when out of your home** |  |  |  |  |  |  |
| **Your eyesight getting worse** |  |  |  |  |  |  |
| **Coping with everyday life** |  |  |  |  |  |  |

**45. In the PAST MONTH, how often have you:**

|  | **Not at all** | **Very rarely** | **A little of the time** | **A fair amount of the time** | **A lot of the time** | **All the time** |
| --- | --- | --- | --- | --- | --- | --- |
| **Felt lonely or isolated** |  |  |  |  |  |  |
| **Needed help from other people because of your eyesight** |  |  |  |  |  |  |

**46. What do you find challenging about having AMD?** Select all that apply.

- Finding answers to my questions about my condition
- Worry that my condition might worsen in the future
- The long wait times for appointments
- Lack of social support
- Explaining my situation to family and friends
- Not being able to do the daily activities I used to
- Socializing
- Other (please specify):

**47. How old are you?**

**48. What biological sex were you assigned at birth?**

- Male
- Female
- Intersex

**49. Which of the following categories best describes your employment status?**

- Retired
- Employed, working full-time
- Employed, working part-time
- Not employed, looking for work
- Student
- Unemployed due to illness or disability
- Homemaker
- Parental leave
- Taking care of a family member
- Other (please specify):

**Figure S2. Interview Facilitation Guide**

Welcome and thank you for agreeing to participate in this interview, to help us understand the patient experience on living with wet age-related macular degeneration. My name is Jennifer Pereira. I’m a member of Dr. Chad Andrew’s research team and I’ll be interviewing you. Dr. Andrews is leading this study and he’s the Senior Manager of Research and Education at Fighting Blindness Canada, an organization with which you may be familiar.

The interview will take about 30 minutes. If it’s alright with you, I’d like to record our conversation, only to make sure that I don’t miss any of your comments. I will not be including your name or contact information on any report or presentation that results from this study. Are you okay with the call being recorded?

The team at Fighting Blindness Canada is very interested in finding out if and how having age-related macular degeneration affects people’s daily lives. They would also like to know how people feel about their treatments, and if there’s anything that can be done to make it easier or more convenient for them to receive regular treatments. We would like to hear about your experiences and opinions. This will help us develop recommendations for healthcare providers on how they can best help people with age-related macular degeneration/diabetic macular edema address concerns they have.

This study has been reviewed and approved by the Institutional Review Board Services.

Do you have any questions about the research before we begin the discussion?

***Educational needs:***

- Tell me about what you felt when you were first diagnosed with AMD
- Looking back, what do you think is the most important thing about AMD that a physician can tell someone who has just been diagnosed?
- How do you like to get information about your condition?
- Do you ask questions about what you’d like to know about?
- Do you prefer a bit of information at each appointment?
- Information you can take home?
- Is there such thing as too much information?

***Treatments:***

- How do you feel about the treatment options for AMD?
- Walk me through what it’s like for you to plan for your injection appointment
- When you know you have an injection coming up, what is going through your mind? How do you feel?
- What is the most difficult part of getting to an appointment?
- What makes you decide whether to go to your appointment or cancel?
- What characteristics of therapy for AMD are most important to you?
- What would make it easier for you to attend an appointment?

***Condition and current therapy-related information:***

- What stands out for you as most significant in how AMD affects your life?
- How do you feel your well-being would differ if you didn’t have AMD?

***Recommendations:***

Are there any recommendations you have for how to improve the lives of people with AMD?

| **Additional Survey Results**  **Table S1. Timing of first eye injection (n = 303)**   | **Timeframe** | **n (%)** | | --- | --- | | <3 months ago | 19 (6.3) | | 3-11 months ago | 66 (21.8) | | 1-5 years ago | 87 (28.7) | | >5 years ago | 72 (23.8) | | Never received an injection | 59 (19.5) | |
| --- | --- | --- | --- | --- | --- | --- | --- | --- | --- | --- | --- | --- |

- ***Patients Receiving AMD Eye Injections***

**Table S2. Number of eye injections scheduled in the last year (n = 215)**

| **Frequency** | **n (%)** |
| --- | --- |
| None | 3 (14.0) |
| 1 to 3 | 94 (43.7) |
| 4 to 6 | 64 (30.0) |
| Over 6 | 54 (25.1) |

**Table S3. Injected AMD drug type (n = 219)**

| **Brand** | **n (%)** |
| --- | --- |
| Avastin (bevacizumab) | 63 (28.8) |
| Lucentis (ranibizumab) | 50 (22.8) |
| Eylea (aflibercept) | 46 (21.0) |
| Ozurdex (dexamethasone intravitreal implant) | 28 (12.8) |
| Don’t know | 26 (11.9) |
| Other | 6 (2.7) |

Note: drug options were presented as brand names to survey participants. **Abbreviations:** AMD, age-related macular degeneration.

**Table S4. Duration of blurry vision after injection (n = 215)**

| **Duration** | **n (%)** |
| --- | --- |
| <1 hour | 23 (10.7) |
| 1 to 3 hours | 101 (47.0) |
| 4 to 6 hours | 55 (25.6) |
| At least 24 hours | 16 (7.4) |
| Until I go to sleep that night | 20 (9.3) |

**Table S5. Ways in which eye injections have helped (n = 220)**

| **Benefit** | **n (%)** |
| --- | --- |
| They helped me avoid losing more eyesight | 161 (73.2) |
| They improved my eyesight | 98 (44.5) |
| Dried up fluid/blood in my eye(s) (n = 252) | 93 (42.3) |
| They have had no effect but I receive injections because my doctor recommends them | 31 (14.1) |
| I don't know | 7 (3.2) |
| Other | 8 (3.6)a |

a Other reported benefits: slowed deterioration; initial improvement; improved depth perception and color identification; injection on one eye was started late so little improvement, other eye was caught early so saved vision; slow improvement with no worsening; no change in the last month (enrolled in a study); doctor says injections are necessary to maintain current eyesight.

- ***Patients Not Receiving AMD Eye Injections***

**Table S6. Number of eye appointments scheduled in the last year (n = 82)**

| **Frequency** | **n (%)** |
| --- | --- |
| None | 14 (17.1) |
| 1 to 3 | 53 (64.6) |
| 4 to 6 | 11 (13.4) |
| Over 6 | 4 (4.9) |

- ***Overall Cohort: Information Needs***

**Table S7. AMD topics of interest (n = 303)**

| **Topics** | **n (%)** |
| --- | --- |
| How to prevent eye(s) from getting worse | 227 (74.9) |
| Prediction of disease worsening | 185 (61.1) |
| Treatment effectiveness from photos presented by doctor | 179 (59.1) |
| New research about AMD | 184 (60.7) |
| Genetic testing and how it may show which people with AMD can be helped by certain vitamins | 136 (44.9) |
| Accessing social services to get to my appointments | 58 (19.1) |
| I don't want more information | 2 (0.6) |
| Other | 6 (2.0)a |

Note: participants could select more than one response.  a More thorough explanation on test results; FBC conference; obtaining stem cell treatment; continuing to work; easing transition to low vision; whether adult children will be affected.
**Abbreviations:** AMD, age-related macular degeneration; FBC, Fighting Blindness Canada.

**Table S8. Preferred sources of AMD information (other than from ophthalmologist) (n = 303)**

| **Source** | **n (%)** |
| --- | --- |
| Online | 198 (65.3) |
| Pamphlets | 110 (36.3) |
| Informational video in my ophthalmologist's waiting room | 106 (35.0) |
| Telephone hotline | 68 (22.4) |
| Nurse calling to check on me | 59 (19.5) |
| Other | 12 (4.0)a |

Note: participants could select more than one response.

a Email; FBC conferences; large print materials; radio; retinal specialist; person to explain condition when you have never heard of it before; non-telephone (to accommodate deafness).

**Abbreviations:** AMD, age-related macular degeneration; FBC, Fighting Blindness Canada.
